# Supplementary material for: Statistical Analysis of Variation in the Human Plasma Proteome
Source: Hindawi journal article supplement (doi:10.1155/2010/258494), 2010-01-01
Supplement: f1 [file 258494.f1.pdf]

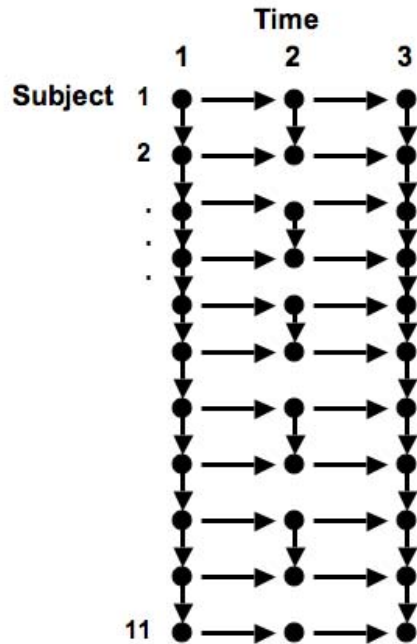

**Supplementary Figure 1.** The experimental design shown in graphical format. The circles represent the 33 samples (eleven subjects at three time points each), the arrows represent the 50 gels. Each sample has three arrows, reflecting its corresponding three technical replicates. Within a gel, the sample at the base of the arrow was labeled with Cy3, and the sample at the end of the arrow was labeled with Cy5. For example, the first gel had the sample of Subject 1 at Time 1 labeled with Cy3, and the sample of Subject 1 at Time 2 labeled with Cy5: Subject<sub>1</sub>Time<sub>1</sub>-> Subject<sub>1</sub>Time<sub>2</sub>. For clarity of the display, three gels are not shown: Subject<sub>11</sub>Time<sub>1</sub>-> Subject<sub>1</sub>Time<sub>1</sub>, Subject<sub>11</sub>Time<sub>2</sub>->Subject<sub>1</sub>Time<sub>2</sub>, and Subject<sub>11</sub>Time<sub>3</sub>->Subject<sub>1</sub>Time<sub>3</sub>. Time points 1, 2, and 3 were coded as x, y, and z, respectively.
